# Supplementary material for: lncRNA SNHG4 modulates colorectal cancer cell cycle and cell proliferation through regulating miR-590-3p/CDK1 axis
Source: publisher site journal article supplement (doi:10.18632/aging.202737), 2021-03-19
Supplement: Supplementary file [file aging-v13i7-202737-supplementary-material-SD1.pdf]

SUPPLEMENTARY FIGURES

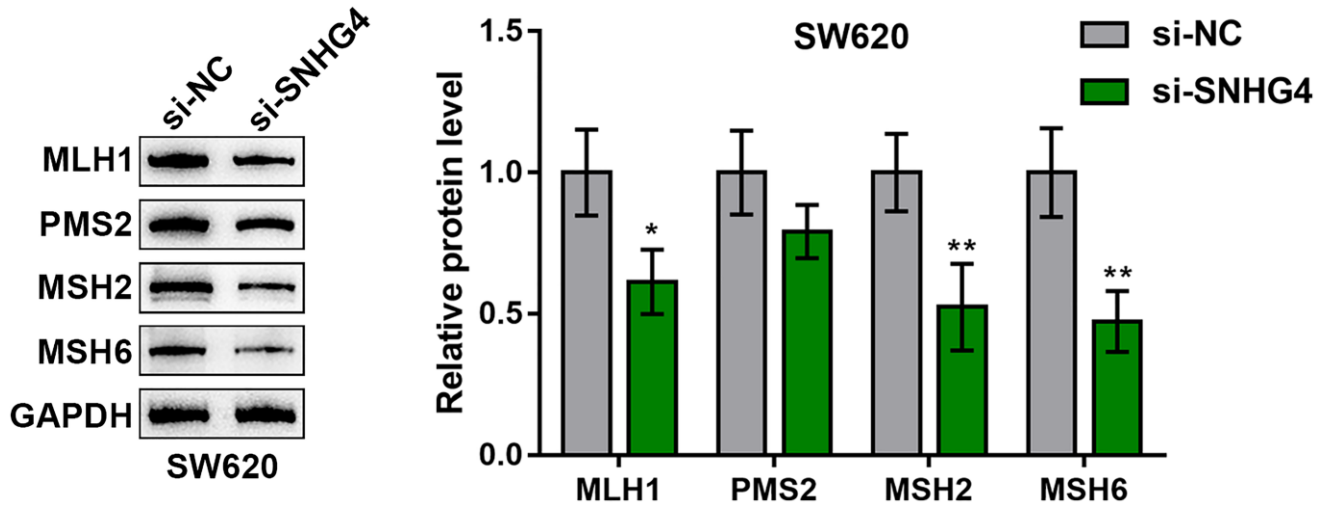

**Supplementary Figure 1. Effects of SNHG4 on CRC cell microsatellite stability.** SW620 cells were transfected with si-SNHG4, and microsatellite stability-related proteins (MLH1, PMS2, MSH2, and MSH6) were detected by immunoblotting assay. \* $P < 0.05$ , \*\* $P < 0.01$ , compared to si-NC group.

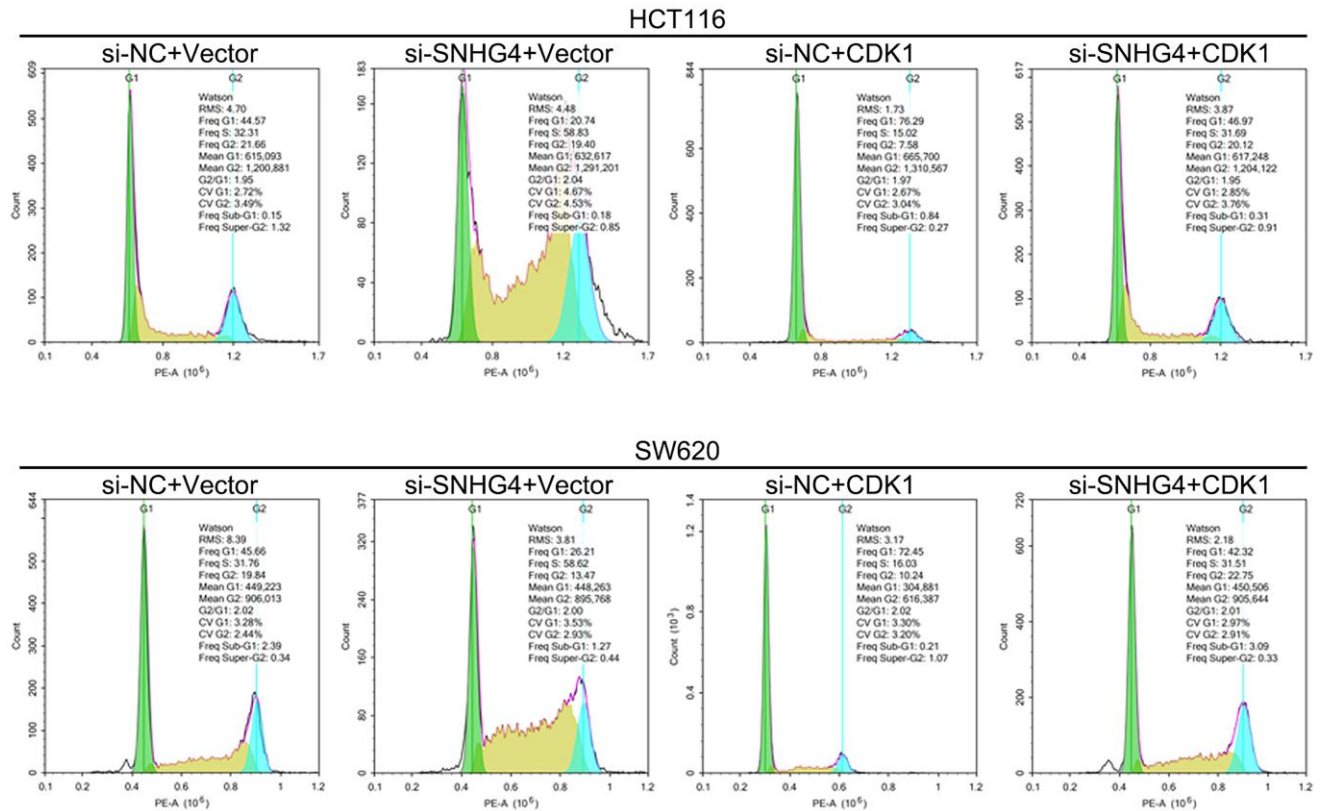

**Supplementary Figure 2. The effect of SNHG4 and CDK1 on the CRC cell cycle.** HCT116 and SW620 cells were transfected with si-SNHG4 and/or CDK1 overexpression vector, and cell cycle progression was examined by flow cytometry.
